# Supplementary material for: Intraoperative hypotension and postoperative pneumonia in patients after selective intracranial tumor resection: a retrospective cohort study
Source: PeerJ. 2025 Aug 4;13:e19514. doi: 10.7717/peerj.19514 (PMC12330818; doi:10.7717/peerj.19514)
Supplement: Supplemental Information 2 [file peerj-13-19514-s002.xlsx]

## Sheet: data
ID	Age （y）	age>65	Sex	Height m	BMI	BMI>=30	Weight（kg）	Tidal volume（ml）	minute ventilation（ml/kg）	1meningioma2glioma3others	pulmonary infection	hypoproteinemia	DM	Hypertenison	CAD	Anemia	COPD	Smoking	Preoperative MAP	Blood infusion	MAP<55	MAP<55duraion	MAP>30%	MAP>30%duration	Neostigmine	ASA	ASA>2	NYHA	Ventilatio_duraion(min)	Ventilatio_duraion(min)>4hour	Fluid_amount（ml）	Fluid_amount>2000ml	blood_loss	blood_loss >500ml	Urine_amount	Surgical_duraion (min)	Surgical_duraion>4hours	Posation1sup2pro3lateral	Anesthesia(1TIVA2sevo)
1	32	0	1	1.69	18.5568	0	69	450	6.52174	1	0	0	0	0	0	0	0	1	78	0	0	0	0	0	0	2	0	1	408	1	1900	0	600	1	500	342	1	1	1
2	52	0	0	1.54	21.0828	0	54	450	8.33333	1	0	0	0	1	0	0	0	0	102	0	0	0	1	5	0	2	0	2	330	1	1600	0	300	0	900	312	1	1	1
3	34	0	0	1.58	20.4294	0	58	450	7.75862	1	0	0	0	0	0	0	0	0	82	0	1	30	1	11	0	2	0	1	348	1	1600	0	500	0	1000	270	1	1	2
4	55	0	0	1.65	30.4867	1	65	550	8.46154	1	0	0	0	0	1	0	0	0	77	0	0	0	0	0	0	2	0	2	168	0	1600	0	200	0	300	120	0	1	1
5	54	0	1	1.74	25.4327	0	74	500	6.75676	1	0	0	0	1	0	0	0	0	89	0	0	0	1	8	0	2	0	2	414	1	2100	1	300	0	750	354	1	2	2
6	26	0	0	1.65	18.3655	0	65	450	6.92308	1	0	1	0	0	0	1	0	0	68	0	0	0	0	0	0	2	0	1	378	1	2450	1	500	0	1800	312	1	2	1
7	40	0	0	1.6	21.4844	0	60	400	6.66667	1	0	0	0	0	0	0	0	0	69	0	0	0	0	0	0	2	0	2	348	1	1750	0	300	0	799	276	1	2	1
8	38	0	1	1.65	24.2424	0	65	450	6.92308	1	0	0	0	0	0	0	1	0	99	0	1	10	1	30	0	2	0	1	300	1	2100	1	150	0	900	258	1	1	1
9	44	0	0	1.5	22.2222	0	50	400	8	2	0	0	0	0	0	0	0	0	78	0	1	5	1	41	0	2	0	1	228	0	2100	1	100	0	900	180	0	1	1
10	42	0	0	1.6	21.4844	0	60	400	6.66667	2	0	0	0	0	0	0	0	0	92	0	0	0	1	28	0	2	0	1	336	1	2100	1	300	0	1400	252	1	1	1
11	29	0	1	1.78	23.6713	0	78	500	6.41026	2	1	0	0	0	0	0	0	0	86	0	1	30	1	28	0	2	0	2	390	1	2100	1	300	0	800	318	1	1	1
12	55	0	0	1.58	41.66	1	58	550	9.48276	2	0	0	1	0	0	0	0	0	84	0	0	0	1	13	0	3	1	3	225	0	2100	1	100	0	900	180	0	1	1
13	41	0	0	1.62	20.5761	0	62	400	6.45161	1	0	1	0	0	0	0	0	0	86	0	0	0	0	0	0	3	1	2	402	1	2200	1	600	1	1600	312	1	2	1
14	50	0	1	1.71	26.3329	0	71	500	7.04225	1	0	1	0	1	0	0	0	0	110	0	1	11	1	11	1	3	1	1	408	1	2700	1	300	0	700	318	1	1	1
15	52	0	0	1.47	27.3034	0	47	400	8.51064	1	0	0	0	0	0	0	0	0	75	0	1	23	1	6	0	2	0	1	234	0	2200	1	400	0	1000	180	0	1	2
16	46	0	1	1.7	24.2215	0	70	500	7.14286	2	0	1	0	0	0	0	0	0	63	0	0	0	0	0	0	2	0	2	420	1	4700	1	800	1	1100	384	1	1	1
17	45	0	0	1.6	23.4375	0	60	400	6.66667	1	0	0	0	0	0	0	0	0	74	0	0	0	0	0	0	2	0	1	642	1	3600	1	1800	1	1400	555	1	3	2
18	47	0	0	1.65	18.7328	0	65	400	6.15385	2	0	0	0	1	0	0	0	0	76	0	0	0	0	0	0	2	0	1	360	1	2100	1	300	0	500	324	1	1	1
19	57	0	0	1.58	21.6311	0	58	400	6.89655	1	1	0	0	1	0	0	0	0	87	0	0	0	1	9	0	2	0	2	345	1	2200	1	500	0	1200	282	1	3	2
20	41	0	1	1.58	20.0288	0	58	400	6.89655	2	0	0	0	0	0	0	0	0	78	1	0	0	0	0	0	2	0	2	405	1	2550	1	500	0	1200	312	1	1	1
21	31	0	1	1.65	20.202	0	65	400	6.15385	2	0	0	0	0	0	0	0	0	89	0	0	0	1	11	0	3	1	1	252	1	2100	1	100	0	1500	225	0	1	2
22	69	1	1	1.68	24.093	0	68	500	7.35294	2	0	1	0	0	0	1	0	0	69	0	0	0	0	0	0	3	1	1	276	1	2100	1	400	0	800	240	0	1	1
23	26	0	0	1.55	26.2227	0	55	500	9.09091	2	0	0	0	0	0	0	0	0	72	0	1	12	1	4	0	3	1	1	288	1	2100	1	400	0	1000	264	1	1	2
24	46	0	1	1.63	24.4646	0	63	500	7.93651	1	0	0	0	0	0	0	0	1	77	0	0	0	0	0	0	3	1	1	312	1	2100	1	500	0	1000	228	0	1	2
25	59	0	0	1.58	20.83	0	58	400	6.89655	2	0	0	0	0	0	0	0	0	78	0	0	0	0	0	0	3	1	2	315	1	2100	1	400	0	700	222	0	1	1
26	29	0	1	1.7	28.0277	0	70	550	7.85714	2	0	0	0	0	0	0	0	0	84	0	1	5	1	12	1	3	1	1	252	1	2100	1	300	0	1300	174	0	1	2
27	57	0	0	1.58	24.0346	0	58	400	6.89655	1	0	1	0	0	0	0	0	0	92	1	1	7	1	31	0	3	1	1	480	1	2200	1	1200	1	1700	432	1	1	2
28	49	0	1	1.7	25.9516	0	70	500	7.14286	2	0	0	0	0	0	0	0	1	101	1	0	0	1	9	1	3	1	1	378	1	2850	1	800	1	1050	285	1	1	2
29	71	1	1	1.7	19.7232	0	70	400	5.71429	1	0	1	0	0	0	0	0	0	98	0	0	0	1	13	0	3	1	2	168	0	1500	0	100	0	500	108	0	1	2
30	68	1	0	1.55	25.8065	0	55	400	7.27273	1	0	1	0	0	0	0	0	0	95	0	1	5	1	32	0	3	1	2	222	0	1600	0	100	0	600	156	0	1	1
31	27	0	0	1.58	20.0288	0	58	400	6.89655	2	0	0	0	0	0	0	0	0	87	0	0	0	0	0	0	2	0	2	216	0	1600	0	300	0	1000	144	0	1	2
32	51	0	0	1.6	17.5781	0	60	400	6.66667	1	0	0	0	0	0	0	0	0	85	0	0	0	0	0	0	2	0	2	312	1	2100	1	200	0	1400	294	1	1	1
33	40	0	1	1.68	18.424	0	68	400	5.88235	2	0	0	0	0	0	0	0	0	79	0	1	14	1	11	0	2	0	1	270	1	2200	1	300	0	500	240	0	1	1
34	25	0	0	1.53	17.5146	0	53	300	5.66038	2	0	0	0	0	0	0	0	0	73	0	0	0	0	0	0	2	0	1	300	1	2700	1	400	0	1300	222	0	2	1
35	52	0	1	1.6	21.4844	0	60	400	6.66667	2	0	0	0	0	0	0	0	0	77	0	0	0	0	0	0	2	0	1	195	0	1350	0	300	0	200	138	0	1	2
36	60	0	0	1.52	21.6413	0	52	400	7.69231	1	0	0	0	0	0	0	0	0	89	0	0	0	1	14	0	2	0	1	420	1	2450	1	800	1	2500	342	1	3	1
37	55	0	0	1.6	19.9219	0	60	400	6.66667	1	0	0	0	0	0	0	0	0	102	0	0	0	1	18	0	2	0	2	198	0	1600	0	200	0	700	132	0	1	1
38	32	0	0	1.6	21.875	0	60	400	6.66667	2	0	0	0	0	0	0	0	0	84	0	1	27	1	21	0	2	0	1	294	1	11350	1	50	0	600	252	1	1	2
39	23	0	1	1.72	18.5911	0	72	400	5.55556	1	0	0	0	0	0	0	0	0	82	0	0	0	0	0	0	2	0	2	195	0	2100	1	300	0	900	165	0	1	2
40	60	0	0	1.52	23.8054	0	52	400	7.69231	2	0	0	0	0	0	0	0	0	88	1	0	0	1	5	0	2	0	2	360	1	2100	1	800	1	1400	300	1	2	2
41	61	0	1	1.67	22.5896	0	67	450	6.71642	1	0	0	0	1	0	0	0	0	89	0	1	6	1	4	0	2	0	1	306	1	2600	1	300	0	400	276	1	2	2
42	40	0	0	1.62	26.6728	0	62	500	8.06452	2	0	0	0	0	0	0	0	0	76	0	1	8	1	9	0	2	0	1	144	0	1600	0	100	0	600	108	0	1	2
43	67	1	1	1.78	25.2493	0	78	500	6.41026	1	0	0	1	1	0	0	0	0	87	0	0	0	1	11	0	3	1	2	222	0	1600	0	300	0	150	168	0	1	1
44	42	0	1	1.67	26.5338	0	67	500	7.46269	2	0	0	0	0	0	0	0	1	70	0	0	0	0	0	0	2	0	1	360	1	1600	0	300	0	650	282	1	1	1
45	25	0	0	1.55	19.1467	0	55	300	5.45455	2	0	0	0	0	0	0	0	0	76	0	0	0	0	0	0	2	0	1	168	0	1600	0	200	0	800	126	0	1	1
46	53	0	0	1.58	22.4323	0	58	400	6.89655	1	0	0	0	0	0	0	0	0	86	0	0	0	1	17	0	2	0	1	255	1	1850	0	100	0	600	210	0	1	1
47	72	1	0	1.6	22.2656	0	60	400	6.66667	1	0	0	0	0	0	0	0	0	98	0	1	11	1	21	0	2	0	2	282	1	1450	0	500	0	400	234	0	1	1
48	52	0	0	1.65	22.7732	0	65	500	7.69231	1	0	0	0	0	0	0	0	0	72	0	0	0	0	0	0	2	0	2	216	0	1350	0	10	0	800	180	0	1	1
49	60	0	0	1.55	22.8928	0	55	400	7.27273	1	0	0	0	0	0	0	0	0	97	1	0	0	1	8	0	4	1	2	678	1	3950	1	1500	1	1800	645	1	3	2
50	45	0	1	1.75	22.8571	0	75	500	6.66667	2	0	0	0	0	0	0	0	1	69	0	0	0	0	0	0	3	1	2	192	0	1850	0	300	0	450	162	0	1	1
51	49	0	0	1.62	27.8159	0	62	500	8.06452	1	0	0	0	1	0	0	0	0	102	0	0	0	1	12	0	2	0	2	306	1	1700	0	200	0	800	258	1	1	2
52	25	0	0	1.6	22.2656	0	60	400	6.66667	2	0	0	0	0	0	0	0	0	88	1	0	0	1	8	0	2	0	1	426	1	2200	1	500	0	1000	330	1	1	1
53	47	0	1	1.65	24.2424	0	65	400	6.15385	2	0	0	0	0	0	0	0	0	85	0	0	0	1	12	0	2	0	1	210	0	1850	0	400	0	900	156	0	1	2
54	20	0	1	1.7	19.0311	0	70	400	5.71429	2	0	0	0	0	0	0	0	0	92	0	0	0	1	21	0	2	0	1	360	1	3200	1	500	0	2000	285	1	1	2
55	38	0	0	1.6	22.2656	0	60	400	6.66667	2	0	0	0	1	0	0	0	0	92	0	0	0	1	30	0	2	0	2	300	1	2850	1	600	1	1000	228	0	1	1
56	40	0	1	1.7	24.9135	0	70	500	7.14286	2	0	0	0	0	0	0	0	0	90	0	1	18	1	28	0	3	1	1	300	1	2250	1	1000	1	400	255	1	1	2
57	64	0	0	1.5	22.2222	0	50	400	8	1	0	0	1	0	0	0	0	0	102	0	0	0	1	41	0	2	0	1	255	1	1600	0	200	0	1000	192	0	1	1
58	55	0	0	1.54	31.6242	1	54	500	9.25926	2	0	0	0	0	0	0	0	0	88	0	0	0	1	28	0	3	1	1	255	1	2600	1	400	0	1700	180	0	1	1
59	43	0	1	1.65	23.5078	0	65	400	6.15385	2	0	0	0	0	0	0	0	0	74	0	1	27	1	13	0	3	1	1	255	1	1950	0	300	0	700	192	0	1	1
60	58	0	0	1.54	21.5045	0	54	400	7.40741	1	0	1	0	0	0	0	0	0	77	0	0	0	0	0	0	3	1	3	270	1	2200	1	600	1	800	222	0	3	1
61	49	0	0	1.6	23.4375	0	60	400	6.66667	1	0	0	0	0	0	0	0	0	79	0	0	0	0	0	0	2	0	1	192	0	1100	0	200	0	400	129	0	3	1
62	51	0	0	1.5	19.1111	0	50	300	6	1	0	0	0	1	0	0	0	0	94	0	0	0	1	24	0	2	0	2	345	1	1600	0	500	0	600	282	1	1	1
63	64	0	0	1.53	19.2234	0	53	400	7.54717	1	0	0	0	1	0	0	0	0	75	0	1	7	1	34	0	2	0	1	306	1	1600	0	300	0	400	258	1	1	1
64	33	0	0	1.57	24.7475	0	57	400	7.01754	2	0	0	0	0	0	0	0	0	79	0	0	0	0	0	0	3	1	1	225	0	1850	0	400	0	300	192	0	1	2
65	57	0	0	1.55	22.4766	0	55	400	7.27273	1	0	1	0	1	0	0	0	0	69	0	0	0	0	0	0	2	0	2	210	0	2350	1	500	0	100	162	0	1	2
66	49	0	0	1.55	24.5578	0	55	400	7.27273	1	0	0	0	0	0	0	0	0	82	0	0	0	0	0	0	2	0	1	240	0	2100	1	200	0	900	192	0	1	1
67	68	1	1	1.45	18.0737	0	45	300	6.66667	1	0	1	0	1	0	0	0	0	68	1	0	0	0	0	0	3	1	2	360	1	2600	1	1200	1	1500	306	1	1	2
68	56	0	0	1.57	25.1532	0	57	500	8.77193	1	0	1	0	1	0	0	0	0	83	0	0	0	0	0	0	2	0	2	270	1	2600	1	500	0	3000	228	0	1	1
69	41	0	0	1.66	25.0399	0	66	500	7.57576	2	0	0	0	0	0	0	0	0	94	0	0	0	1	6	0	3	1	2	390	1	2100	1	300	0	700	276	1	1	1
70	41	0	0	1.58	22.4323	0	58	400	6.89655	1	1	1	0	0	0	0	0	0	96	0	1	11	1	8	0	2	0	2	348	1	2950	1	600	1	1200	288	1	2	1
71	60	0	1	1.75	27.4286	0	75	550	7.33333	1	1	0	1	1	0	0	0	1	82	0	0	0	0	0	0	2	0	1	348	1	2600	1	400	0	1200	300	1	1	2
72	63	0	0	1.55	20.8117	0	55	400	7.27273	1	0	0	0	1	0	0	0	0	74	1	1	11	1	25	0	3	1	2	486	1	3300	1	1600	1	1500	420	1	3	1
73	43	0	0	1.55	19.563	0	55	400	7.27273	1	0	0	0	0	0	0	0	0	66	0	0	0	0	0	0	2	0	2	486	1	3100	1	500	0	2000	450	1	1	1
74	53	0	1	1.7	22.4913	0	70	450	6.42857	2	1	0	0	0	0	0	0	1	98	0	0	0	1	6	0	2	0	2	330	1	1600	0	100	0	1300	288	1	1	1
75	20	0	1	1.67	20.0796	0	67	400	5.97015	1	0	0	0	0	0	0	0	0	87	0	1	6	1	8	0	3	1	2	192	0	2100	1	100	0	800	150	0	1	1
76	72	1	1	1.68	17.3611	0	68	400	5.88235	1	0	0	0	0	0	0	0	0	86	1	0	0	1	7	0	2	0	2	435	1	2200	1	2000	1	1000	342	1	1	1
77	36	0	0	1.58	24.4352	0	58	500	8.62069	1	0	0	0	0	0	0	0	0	81	0	0	0	0	0	0	2	0	1	300	1	2600	1	500	0	1700	222	0	1	1
78	57	0	0	1.59	25.711	0	59	500	8.47458	2	1	0	0	1	0	0	0	0	75	0	1	23	1	8	0	3	1	2	360	1	2100	1	300	0	1800	300	1	1	2
79	50	0	1	1.7	19.3772	0	70	400	5.71429	2	1	1	0	0	0	0	0	0	72	1	1	16	1	13	0	3	1	1	420	1	3200	1	700	1	200	360	1	1	1
80	48	0	0	1.58	17.6254	0	58	300	5.17241	2	0	0	0	0	0	0	0	0	79	0	0	0	0	0	0	3	1	1	378	1	2200	1	300	0	800	318	1	1	1
81	47	0	1	1.65	26.8136	0	65	550	8.46154	1	0	0	0	1	0	0	0	0	72	0	0	0	0	0	0	2	0	2	180	0	2100	1	300	0	250	138	0	1	2
82	61	0	0	1.56	18.4911	0	56	300	5.35714	2	0	0	0	0	0	0	0	0	92	0	1	16	1	21	0	2	0	2	225	0	1600	0	100	0	200	165	0	1	2
83	48	0	0	1.52	26.8352	0	52	400	7.69231	1	0	0	0	0	0	0	0	0	82	0	0	0	0	0	0	2	0	1	330	1	1600	0	200	0	900	276	1	1	2
84	48	0	0	1.58	20.0288	0	58	400	6.89655	1	0	0	0	0	0	0	0	0	87	0	0	0	1	18	0	2	0	1	318	1	2200	1	300	0	1200	228	0	1	2
85	55	0	1	1.68	26.5731	0	68	500	7.35294	2	0	0	0	1	0	1	0	0	86	0	0	0	0	0	0	3	1	2	435	1	2500	1	500	0	200	360	1	1	1
86	55	0	0	1.58	22.0317	0	58	400	6.89655	2	1	0	0	1	0	0	0	0	88	0	0	0	1	8	0	3	1	1	270	1	1100	0	400	0	500	225	0	1	2
87	25	0	0	1.59	18.591	0	59	400	6.77966	1	0	0	0	0	0	0	0	0	66	0	1	21	1	6	0	2	0	2	306	1	1600	0	560	1	400	276	1	1	1
88	46	0	1	1.7	20.7612	0	70	450	6.42857	2	0	1	0	0	0	0	0	0	92	1	0	0	1	9	0	3	1	1	318	1	3000	1	500	0	600	285	1	2	1
89	63	0	1	1.8	21.2963	0	80	500	6.25	2	0	0	0	1	0	0	0	0	89	0	0	0	1	13	0	4	1	2	258	1	2600	1	200	0	1600	198	0	1	1
90	74	1	0	1.5	20.4444	0	50	400	8	1	0	1	0	0	0	0	0	0	76	1	0	0	0	0	0	3	1	2	330	1	2100	1	1000	1	800	270	1	1	1
91	52	0	0	1.55	23.3091	0	55	400	7.27273	1	0	1	0	0	0	0	0	0	88	0	0	0	0	0	0	2	0	2	318	1	1600	0	200	0	500	240	0	2	2
92	26	0	1	1.7	21.1073	0	70	500	7.14286	2	0	0	0	0	0	0	0	0	65	0	0	0	0	0	0	2	0	1	276	1	2000	0	300	0	1700	198	0	1	1
93	61	0	1	1.8	23.1481	0	80	550	6.875	1	0	0	0	1	0	0	0	0	92	0	0	0	1	5	0	3	1	1	195	0	1100	0	500	0	150	162	0	1	2
94	47	0	0	1.62	22.8624	0	62	400	6.45161	1	0	0	0	0	0	0	0	0	89	0	0	0	1	24	0	2	0	1	210	0	1600	0	300	0	300	162	0	1	2
95	62	0	0	1.55	24.974	0	55	450	8.18182	2	0	0	0	0	0	0	0	0	82	0	1	5	1	3	0	2	0	3	165	0	1600	0	200	0	600	72	0	3	2
96	46	0	0	1.54	21.0828	0	54	400	7.40741	2	0	1	0	0	0	0	0	0	77	0	0	0	0	0	0	2	0	1	342	1	1850	0	100	0	1000	258	1	1	1
97	64	0	1	1.7	24.2215	0	70	550	7.85714	2	0	0	0	0	0	0	0	0	79	1	0	0	0	0	0	2	0	2	306	1	2750	1	1300	1	1500	240	0	2	1
98	42	0	0	1.62	20.1951	0	62	400	6.45161	1	0	0	0	0	0	0	0	0	72	0	0	0	0	0	0	2	0	2	396	1	2950	1	800	1	1200	324	1	3	1
99	56	0	1	1.72	22.9854	0	72	400	5.55556	1	0	0	0	1	0	0	0	0	93	1	0	0	1	6	0	2	0	2	246	1	1600	0	800	1	400	195	0	3	2
100	64	0	0	1.55	24.974	0	55	400	7.27273	1	0	0	0	0	0	0	0	0	84	0	0	0	1	14	0	2	0	1	240	0	1600	0	100	0	400	192	0	1	1
101	43	0	0	1.6	24.2187	0	60	400	6.66667	1	0	0	0	0	0	0	0	0	85	1	1	7	1	6	0	2	0	2	300	1	2100	1	1000	1	1700	252	1	1	2
102	64	0	0	1.57	24.3418	0	57	400	7.01754	1	1	1	0	0	0	0	0	0	85	1	0	0	0	0	0	3	1	1	420	1	3000	1	1000	1	2300	360	1	1	1
103	53	0	0	1.58	22.4323	0	58	400	6.89655	1	1	0	0	1	0	0	0	0	95	0	1	36	1	32	0	2	0	2	300	1	2100	1	500	0	300	240	0	1	1
104	40	0	0	1.65	31.2213	1	65	550	8.46154	1	0	0	0	0	0	0	0	0	92	0	0	0	1	14	0	2	0	1	264	1	2100	1	300	0	600	222	0	3	1
105	40	0	0	1.5	20.8889	0	50	400	8	1	0	0	0	0	0	0	0	0	66	1	1	11	1	11	0	2	0	1	408	1	2200	1	600	1	1000	300	1	2	2
106	63	0	0	1.65	25.3444	0	65	500	7.69231	1	0	0	0	1	0	0	0	0	92	0	1	15	1	21	0	2	0	1	405	1	3200	1	600	1	1000	342	1	1	2
107	41	0	0	1.58	19.2277	0	58	400	6.89655	1	0	0	0	0	0	0	0	0	92	0	0	0	1	9	0	4	1	3	255	1	2100	1	300	0	700	240	0	3	2
108	70	1	0	1.5	22.2222	0	50	300	6	1	0	0	0	0	0	0	0	0	87	0	0	0	0	0	0	2	0	1	300	1	2200	1	500	0	2200	222	0	1	1
109	40	0	0	1.59	25.711	0	59	400	6.77966	1	0	0	1	0	0	0	0	0	75	0	0	0	0	0	0	2	0	1	345	1	3200	1	400	0	1600	300	1	3	1
110	57	0	1	1.67	20.7967	0	67	400	5.97015	1	1	1	0	0	0	0	0	0	91	0	1	18	1	42	0	2	0	1	360	1	3100	1	500	0	650	318	1	3	1
111	48	0	0	1.58	24.0346	0	58	400	6.89655	1	0	0	0	0	0	0	0	0	77	0	0	0	0	0	0	3	1	2	240	0	2100	1	50	0	200	138	0	1	1
112	55	0	1	1.71	26.6749	0	71	550	7.74648	1	1	0	0	1	0	0	0	0	98	0	0	0	1	32	0	2	0	2	420	1	1850	0	80	0	1200	360	1	1	1
113	47	0	1	1.75	27.7551	0	75	550	7.33333	2	0	0	0	0	0	0	0	0	79	0	1	17	1	16	0	2	0	1	456	1	1850	0	200	0	1200	405	1	1	2
114	45	0	1	1.67	25.8166	0	67	500	7.46269	2	1	0	0	0	0	0	0	1	104	0	1	36	1	7	0	2	0	2	462	1	3100	1	200	0	400	420	1	1	2
115	43	0	1	1.78	28.4055	0	78	600	7.69231	2	0	1	0	0	0	0	0	0	92	0	0	0	1	25	0	2	0	1	420	1	2200	1	400	0	400	372	1	1	1
116	45	0	0	1.55	23.3091	0	55	400	7.27273	2	1	0	0	0	0	0	0	0	84	0	0	0	0	0	0	3	1	2	498	1	2350	1	300	0	800	456	1	1	2
117	40	0	0	1.6	36.3281	1	60	600	10	2	1	0	0	0	0	0	0	0	104	0	1	28	1	48	0	2	0	1	375	1	2100	1	300	0	1500	318	1	1	1
118	36	0	0	1.55	23.7253	0	55	400	7.27273	2	0	0	0	0	0	0	0	0	89	0	0	0	1	14	0	2	0	2	330	1	2850	1	200	0	1800	276	1	2	2
119	25	0	0	1.6	21.4844	0	60	400	6.66667	2	0	0	0	0	0	0	0	0	79	0	0	0	1	5	0	2	0	1	378	1	2350	1	500	0	2000	300	1	3	1
120	28	0	0	1.55	22.0604	0	55	400	7.27273	2	0	0	0	0	0	0	0	0	69	0	0	0	0	0	0	2	0	1	288	1	2100	1	200	0	1400	246	1	2	1
121	45	0	1	1.65	22.0386	0	65	500	7.69231	2	0	1	0	0	0	0	0	0	79	1	0	0	0	0	0	2	0	1	294	1	2000	0	300	0	2000	246	1	2	1
122	52	0	0	1.53	22.2137	0	53	400	7.54717	2	0	0	0	0	0	0	0	0	102	0	0	0	1	35	0	2	0	2	414	1	3350	1	200	0	2000	360	1	1	1
123	49	0	0	1.5	23.1111	0	50	400	8	2	0	0	0	0	0	0	0	0	89	0	0	0	1	51	0	3	1	1	420	1	2950	1	200	0	1300	342	1	1	1
124	35	0	1	1.69	23.8087	0	69	500	7.24638	2	0	1	0	0	0	0	0	1	77	0	0	0	0	0	0	2	0	1	288	1	2200	1	200	0	1500	228	0	3	1
125	22	0	0	1.6	25.3906	0	60	500	8.33333	2	0	1	0	0	0	0	0	0	81	0	0	0	1	17	0	2	0	2	288	1	3100	1	300	0	2000	156	0	3	1
126	55	0	1	1.7	24.9135	0	70	550	7.85714	2	1	0	0	0	0	0	0	1	84	0	0	0	0	0	0	2	0	1	660	1	2100	1	150	0	1700	612	1	3	2
127	41	0	1	1.64	22.3081	0	64	500	7.8125	3	0	1	0	0	0	0	0	0	95	0	0	0	1	27	0	2	0	2	246	1	2100	1	400	0	600	195	0	1	1
128	29	0	0	1.57	21.0962	0	57	400	7.01754	2	0	1	0	0	0	0	0	0	88	0	0	0	0	0	0	3	1	1	168	0	1750	0	100	0	800	108	0	1	1
129	25	0	1	1.69	19.257	0	69	400	5.7971	2	1	0	0	0	0	0	0	1	89	0	0	0	1	12	1	2	0	1	408	1	4500	1	100	0	3300	372	1	1	2
130	65	0	0	1.55	18.3143	0	55	400	7.27273	2	0	1	0	0	0	0	0	0	77	0	0	0	0	0	0	2	0	2	318	1	1600	0	200	0	850	258	1	3	1
131	59	0	0	1.6	23.4375	0	60	500	8.33333	1	0	1	0	0	0	0	0	0	86	0	0	0	1	13	0	3	1	1	438	1	1700	0	300	0	1100	354	1	1	2
132	63	0	1	1.67	21.5139	0	67	500	7.46269	2	1	0	0	0	0	0	0	1	72	0	0	0	0	0	0	3	1	2	228	0	1100	0	100	0	800	192	0	2	2
133	51	0	0	1.6	21.4844	0	60	400	6.66667	1	1	0	0	0	0	0	0	0	94	0	1	20	1	31	0	2	0	2	258	1	3100	1	200	0	2000	222	0	1	1
134	38	0	0	1.58	23.2335	0	58	400	6.89655	2	0	1	0	0	0	0	0	0	74	0	0	0	0	0	0	2	0	1	252	1	2000	0	200	0	1000	216	0	1	1
135	37	0	0	1.65	22.0386	0	65	400	6.15385	2	1	1	0	0	0	0	0	0	68	0	0	0	0	0	0	3	1	1	402	1	2100	1	300	0	350	342	1	1	1
136	51	0	1	1.68	23.03	0	68	500	7.35294	2	0	1	0	1	0	0	0	0	102	0	0	0	1	19	1	3	1	1	552	1	3100	1	200	0	1200	498	1	1	1
137	55	0	0	1.72	24.6755	0	72	500	6.94444	1	0	0	0	0	0	0	0	0	93	1	0	0	1	26	0	3	1	1	378	1	2700	1	1200	1	1000	342	1	1	2
138	65	0	1	1.67	27.968	0	67	500	7.46269	2	0	1	0	0	0	0	0	1	82	0	0	0	1	41	0	2	0	2	414	1	1700	0	400	0	1200	330	1	1	1
139	44	0	0	1.62	18.2899	0	62	400	6.45161	2	0	0	0	0	0	0	0	0	85	0	1	15	1	13	0	2	0	1	234	0	2200	1	400	0	1300	180	0	1	1
140	49	0	0	1.56	22.6003	0	56	400	7.14286	2	0	1	0	0	0	0	0	0	79	0	0	0	1	6	0	2	0	2	276	1	2300	1	300	0	1000	240	0	1	1
141	55	0	1	1.68	22.6757	0	68	500	7.35294	1	0	1	0	0	0	0	0	0	65	0	1	5	1	8	0	2	0	1	378	1	3200	1	500	0	2500	300	1	1	2
142	53	0	0	1.74	26.0933	0	74	500	6.75676	1	0	0	0	0	0	0	0	0	89	0	0	0	1	11	0	2	0	2	240	0	2100	1	600	1	550	210	0	1	1
143	59	0	1	1.68	33.6593	1	68	600	8.82353	1	0	0	0	1	0	0	0	0	101	0	0	0	1	21	0	2	0	1	360	1	2550	1	500	0	300	300	1	1	1
144	41	0	0	1.65	22.0386	0	65	400	6.15385	2	0	0	0	0	0	0	0	1	75	1	0	0	0	0	0	2	0	1	450	1	2900	1	800	1	500	384	1	1	1
145	42	0	1	1.668	21.5655	0	66.8	400	5.98802	2	0	0	0	0	0	0	0	0	71	0	0	0	0	0	0	2	0	2	402	1	2250	1	300	0	1000	342	1	1	1
146	48	0	0	1.5	22.6667	0	50	400	8	1	0	0	0	0	0	0	0	0	69	0	1	14	1	3	0	2	0	2	258	1	2100	1	200	0	750	198	0	1	1
147	53	0	1	1.55	18.7305	0	55	300	5.45455	2	1	1	0	0	0	0	0	0	92	0	1	10	1	15	0	4	1	2	342	1	2100	1	150	0	1800	282	1	1	2
148	36	0	1	1.72	22.9854	0	72	500	6.94444	2	0	0	0	0	0	0	0	0	105	0	0	0	1	23	0	2	0	2	318	1	2600	1	200	0	1100	282	1	1	1
149	44	0	0	1.55	23.7253	0	55	400	7.27273	1	0	1	0	0	0	0	0	0	77	1	0	0	0	0	0	3	1	2	402	1	3200	1	1600	1	1800	348	1	1	2
150	46	0	0	1.56	22.1893	0	56	400	7.14286	1	0	1	0	0	0	0	0	0	84	0	0	0	0	0	0	3	1	1	384	1	2200	1	400	0	1000	318	1	1	2
151	35	0	1	1.8	17.284	0	80	400	5	1	1	0	0	0	0	0	0	0	68	0	0	0	0	0	1	3	1	2	588	1	2700	1	350	0	1500	540	1	1	1
152	47	0	0	1.45	20.4518	0	45	350	7.77778	1	0	1	0	0	0	0	0	0	77	0	0	0	0	0	1	2	0	2	312	1	1700	0	200	0	1500	228	0	1	1
153	55	0	0	1.55	24.1415	0	55	400	7.27273	1	0	0	1	0	0	0	0	0	74	0	1	11	1	18	1	3	1	2	222	0	2700	1	200	0	1100	198	0	1	1
154	44	0	1	1.65	36.7309	1	65	600	9.23077	1	0	1	0	1	0	0	0	0	96	0	0	0	1	26	0	3	1	2	456	1	3400	1	2000	1	300	378	1	1	2
155	52	0	1	1.56	27.1203	0	56	450	8.03571	2	0	1	0	0	0	0	0	0	80	0	0	0	0	0	0	3	1	1	342	1	2200	1	300	0	1000	288	1	1	2
156	55	0	0	1.5	23.1111	0	50	400	8	1	0	1	0	0	0	0	0	0	90	0	0	0	1	30	0	2	0	1	198	0	2100	1	300	0	800	162	0	1	2
157	45	0	0	1.54	23.6128	0	54	400	7.40741	1	0	1	0	0	0	0	0	0	92	0	0	0	1	62	1	3	1	1	282	1	3000	1	600	1	200	222	0	1	1
158	55	0	1	1.7	20.7612	0	70	400	5.71429	2	0	1	0	0	0	0	0	0	71	0	0	0	0	0	1	4	1	2	258	1	1600	0	200	0	100	210	0	1	2
159	55	0	0	1.59	22.9421	0	59	450	7.62712	1	0	1	0	0	0	0	0	0	69	0	0	0	0	0	0	3	1	1	300	1	1700	0	300	0	1200	240	0	1	1
160	41	0	0	1.6	19.5312	0	60	400	6.66667	1	0	1	0	0	0	0	0	1	66	0	0	0	0	0	0	3	1	1	276	1	2100	1	500	0	800	210	0	1	2
161	73	1	1	1.66	24.3141	0	66	450	6.81818	1	0	1	0	0	0	0	0	1	79	0	1	8	1	26	0	3	1	2	222	0	1700	0	300	0	1000	180	0	1	1
162	57	0	0	1.6	25.3906	0	60	450	7.5	1	0	0	0	0	0	0	0	0	83	1	0	0	1	17	0	3	1	1	618	1	2600	1	1600	1	1500	540	1	1	1
163	58	0	0	1.56	22.6003	0	56	400	7.14286	1	0	0	0	0	1	0	0	0	91	0	0	0	1	55	0	3	1	1	180	0	1600	0	200	0	1000	150	0	1	1
164	47	0	0	1.6	25.3906	0	60	450	7.5	1	0	0	1	0	0	0	0	0	93	0	0	0	1	46	0	3	1	1	216	0	2100	1	100	0	500	168	0	1	2
165	62	0	0	1.51	19.736	0	51	300	5.88235	1	0	1	0	0	0	0	0	0	69	0	0	0	0	0	0	2	0	1	270	1	1700	0	200	0	750	198	0	1	2
166	48	0	0	1.65	30.1194	1	65	600	9.23077	1	0	0	0	0	0	0	0	0	75	0	0	0	0	0	0	2	0	1	264	1	1600	0	200	0	200	228	0	1	1
167	61	0	0	1.5	28.8889	0	50	500	10	1	0	0	0	0	0	0	0	0	101	0	0	0	1	34	0	2	0	2	366	1	2600	1	150	0	1000	318	1	1	1
168	65	0	1	1.6	19.9219	0	60	300	5	1	0	1	0	0	0	0	1	0	84	1	1	4	1	2	1	3	1	1	480	1	3300	1	600	1	1300	390	1	1	2
169	49	0	1	1.66	27.5802	0	66	550	8.33333	2	0	0	0	0	0	0	0	0	89	0	0	0	1	41	0	3	1	2	432	1	2350	1	200	0	2500	318	1	1	2
170	65	0	0	1.55	19.9792	0	55	300	5.45455	1	1	1	0	0	0	0	0	0	79	0	0	0	0	0	0	2	0	2	438	1	3100	1	950	1	1000	270	1	1	2
171	61	0	0	1.56	20.5457	0	56	300	5.35714	1	1	0	0	1	0	0	0	0	87	0	1	13	1	26	0	3	1	1	486	1	2100	1	150	0	1500	342	1	1	1
172	41	0	0	1.64	19.7055	0	64	300	4.6875	2	0	0	0	0	0	0	0	0	76	0	0	0	0	0	0	2	0	1	300	1	2100	1	100	0	600	186	0	1	1
173	69	1	0	1.5	23.1111	0	50	300	6	1	0	0	0	0	0	0	0	0	92	0	0	0	1	11	0	2	0	1	408	1	1600	0	300	0	1500	288	1	3	1
174	55	0	0	1.64	22.3081	0	64	400	6.25	3	0	0	0	0	0	0	0	0	93	0	1	14	1	9	0	2	0	2	228	0	2100	1	300	0	900	156	0	1	2
175	55	0	0	1.6	16.7969	0	60	300	5	2	0	0	0	0	0	0	0	0	79	0	0	0	0	0	0	2	0	2	342	1	2100	1	100	0	500	264	1	1	2
176	64	0	0	1.56	17.2584	0	56	300	5.35714	3	0	0	0	1	0	0	0	0	86	0	0	0	0	0	0	3	1	1	312	1	2850	1	50	0	1400	198	0	1	1
177	50	0	0	1.6	22.6562	0	60	400	6.66667	1	0	0	0	1	0	0	0	0	88	0	0	0	1	7	0	2	0	2	270	1	1600	0	200	0	600	168	0	1	1
178	53	0	1	1.67	18.2868	0	67	400	5.97015	2	0	0	0	0	0	0	0	0	101	1	0	0	1	54	1	3	1	1	678	1	3100	1	800	1	900	582	1	2	1
179	64	0	0	1.6	27.3437	0	60	550	9.16667	1	1	0	0	0	0	1	0	0	68	1	1	44	1	12	0	2	0	1	546	1	1600	0	400	0	900	450	1	2	1
180	44	0	0	1.68	20.5499	0	68	400	5.88235	3	0	0	0	0	0	0	0	0	81	0	0	0	1	21	0	2	0	1	510	1	3100	1	300	0	2500	408	1	2	1
181	57	0	1	1.62	24.0055	0	62	450	7.25806	1	0	0	0	0	0	0	0	0	85	0	0	0	0	0	0	2	0	2	600	1	3100	1	500	0	1200	492	1	2	2
182	60	0	0	1.55	20.3954	0	55	300	5.45455	2	0	0	0	0	0	0	0	0	95	0	0	0	1	34	0	2	0	2	324	1	2850	1	100	0	500	252	1	1	1
183	37	0	0	1.63	20.7008	0	63	300	4.7619	1	0	0	0	0	0	0	0	0	73	0	1	6	1	11	0	2	0	1	420	1	2200	1	300	0	1800	306	1	2	2
184	63	0	0	1.55	22.8928	0	55	300	5.45455	3	0	1	0	0	0	0	0	0	68	0	1	21	1	13	0	3	1	2	288	1	2100	1	300	0	1200	198	0	1	1
185	39	0	1	1.71	24.281	0	71	550	7.74648	1	0	1	0	0	0	0	0	0	81	1	0	0	0	0	0	3	1	1	372	1	3100	1	3200	1	700	348	1	1	1
186	47	0	1	1.6	27.3437	0	60	500	8.33333	3	0	0	0	0	0	0	0	0	82	0	0	0	0	0	0	3	1	1	450	1	2100	1	500	0	1100	372	1	1	1
187	49	0	0	1.56	24.2439	0	56	400	7.14286	2	1	0	1	0	0	0	0	0	92	1	1	25	1	42	0	2	0	2	318	1	1800	0	200	0	800	228	0	1	1
188	59	0	0	1.5	20.4444	0	50	300	6	1	1	0	0	0	0	0	0	0	69	0	0	0	0	0	0	2	0	2	546	1	2600	1	200	0	2100	378	1	2	1
189	33	0	0	1.7	25.9516	0	70	550	7.85714	2	0	1	0	0	0	0	0	0	82	0	0	0	0	0	0	2	0	1	390	1	2350	1	400	0	1800	300	1	1	1
190	53	0	0	1.6	19.1406	0	60	300	5	1	0	1	0	0	0	0	0	0	77	0	0	0	0	0	1	3	1	1	330	1	2100	1	100	0	1000	192	0	1	1
191	53	0	1	1.68	20.5499	0	68	400	5.88235	2	0	1	0	0	0	0	0	0	80	0	0	0	1	15	0	3	1	1	378	1	2700	1	200	0	400	282	1	1	1
192	56	0	0	1.55	21.2279	0	55	300	5.45455	1	0	1	0	0	0	0	0	0	91	0	0	0	1	13	1	3	1	2	312	1	2250	1	250	0	2000	180	0	1	1
193	33	0	0	1.57	19.8791	0	57	300	5.26316	1	1	0	0	0	0	0	0	0	82	0	1	32	1	21	0	3	1	1	540	1	2100	1	700	1	1200	390	1	1	1
194	47	0	0	1.53	21.3593	0	53	300	5.66038	2	0	0	0	0	0	0	0	0	79	0	1	8	1	33	1	3	1	2	408	1	2600	1	200	0	1700	312	1	1	1
195	52	0	0	1.56	23.0112	0	56	300	5.35714	3	0	1	0	0	0	0	0	0	83	1	0	0	1	17	0	3	1	1	558	1	2400	1	500	0	1500	438	1	3	1
196	54	0	0	1.6	22.2656	0	60	350	5.83333	3	0	1	0	0	0	0	0	0	90	0	0	0	1	6	0	3	1	2	348	1	1700	0	100	0	900	228	0	2	2
197	78	1	1	1.65	23.8751	0	65	400	6.15385	2	0	1	0	1	0	0	0	0	85	0	1	11	1	19	1	3	1	1	432	1	3100	1	300	0	1600	240	0	1	2
198	53	0	0	1.56	20.5457	0	56	300	5.35714	2	1	0	0	0	0	0	0	0	91	0	0	0	1	42	0	3	1	2	330	1	2200	1	300	0	1100	222	0	1	1
199	36	0	1	1.7	26.6436	0	70	550	7.85714	2	0	1	0	1	0	0	0	0	82	0	0	0	1	21	0	3	1	1	420	1	2600	1	400	0	2000	312	1	1	2
200	40	0	1	1.68	22.3214	0	68	450	6.61765	3	1	1	0	0	0	0	0	0	79	0	1	5	1	31	0	3	1	1	522	1	2600	1	200	0	2000	378	1	2	2
201	54	0	0	1.55	18.7305	0	55	300	5.45455	2	0	1	1	0	0	0	0	0	67	0	0	0	0	0	0	3	1	1	318	1	2200	1	100	0	1200	234	0	1	2
202	45	0	1	1.65	26.8136	0	65	550	8.46154	2	0	0	0	0	0	0	0	1	69	0	0	0	0	0	0	3	1	1	630	1	4100	1	300	0	2600	498	1	1	1
203	47	0	1	1.6	27.3437	0	60	550	9.16667	3	0	0	0	0	0	0	0	0	82	0	1	14	1	24	0	3	1	1	456	1	2100	1	500	0	1100	372	1	1	1
204	61	0	0	1.6	19.5312	0	60	300	5	1	0	1	0	0	0	0	0	0	77	0	1	13	1	16	0	3	1	1	510	1	2700	1	400	0	2000	294	1	3	2
205	44	0	0	1.58	25.6369	0	58	450	7.75862	2	0	1	0	0	0	0	0	0	68	0	0	0	0	0	0	3	1	2	390	1	2350	1	300	0	2100	318	1	1	1
206	71	1	1	1.75	23.5102	0	75	550	7.33333	2	1	1	0	0	0	0	0	1	92	0	1	24	1	7	0	3	1	1	450	1	2700	1	200	0	1000	300	1	1	2
207	47	0	0	1.55	22.8928	0	55	400	7.27273	1	1	0	0	0	0	0	0	0	83	0	0	0	1	22	0	3	1	1	570	1	2100	1	300	0	1300	462	1	2	2
208	50	0	0	1.56	24.6548	0	56	400	7.14286	2	0	0	0	0	0	0	0	0	77	0	0	0	0	0	0	3	1	2	372	1	2200	1	100	0	1300	120	0	2	1
209	45	0	0	1.58	19.2277	0	58	300	5.17241	3	0	1	0	0	0	0	0	0	69	0	0	0	0	0	0	2	0	1	408	1	1700	0	500	0	1200	252	1	2	1
210	65	0	0	1.55	19.9792	0	55	300	5.45455	1	1	1	0	0	0	0	0	0	72	0	1	35	1	31	0	2	0	1	444	1	3100	1	950	1	1000	270	1	1	2
211	56	0	0	1.53	19.2234	0	53	300	5.66038	1	0	1	0	0	0	0	0	1	79	0	0	0	0	0	0	3	1	1	324	1	1700	0	500	0	1100	210	0	3	2
212	43	0	0	1.56	27.1203	0	56	450	8.03571	1	1	0	0	0	0	0	0	0	76	0	0	0	0	0	0	3	1	1	570	1	3600	1	600	1	2150	492	1	1	1
213	71	1	1	1.66	25.4028	0	66	500	7.57576	2	0	0	0	0	0	0	0	0	91	0	1	8	1	14	0	2	0	1	390	1	2100	1	400	0	650	270	1	1	2
214	46	0	0	1.65	22.0386	0	65	400	6.15385	1	0	1	0	0	0	0	0	0	101	0	1	8	1	8	0	3	1	1	468	1	2100	1	550	1	1400	348	1	1	2
215	52	0	0	1.61	21.9899	0	61	400	6.55738	1	0	1	0	0	0	0	0	0	85	0	1	5	1	24	0	3	1	1	384	1	2700	1	200	0	1700	312	1	1	1
216	76	1	0	1.6	15.625	0	60	300	5	1	0	1	0	0	0	0	0	0	89	1	0	0	1	54	0	3	1	1	468	1	2200	1	500	0	1300	336	1	1	2
217	49	0	1	1.68	26.5731	0	68	550	8.08824	1	0	1	0	0	0	0	0	0	92	1	0	0	1	3	1	3	1	2	618	1	3400	1	1800	1	1600	468	1	1	1
218	63	0	1	1.69	26.2596	0	69	550	7.97101	1	0	0	0	1	0	1	0	0	93	0	0	0	1	16	0	2	0	2	432	1	2700	1	500	0	2000	348	1	1	2
219	49	0	1	1.68	26.5731	0	68	550	8.08824	1	0	1	0	0	0	1	0	0	73	1	0	0	0	0	1	3	1	2	615	1	3400	1	1800	1	1600	468	1	1	1
220	66	1	0	1.55	20.8117	0	55	300	5.45455	1	0	1	0	0	0	0	0	0	71	0	0	0	0	0	0	3	1	2	402	1	2600	1	500	0	800	300	1	1	2
221	27	0	1	1.58	21.2306	0	58	300	5.17241	2	0	0	0	0	0	0	0	0	85	0	1	12	1	32	0	2	0	1	480	1	2600	1	200	0	1000	342	1	1	1
222	44	0	1	1.7	20.7612	0	70	400	5.71429	2	0	1	0	0	0	0	0	0	88	1	1	5	1	26	0	2	0	2	450	1	2100	1	400	0	800	402	1	1	1
223	60	0	0	1.5	24.4444	0	50	300	6	1	0	0	0	1	0	0	0	0	78	0	0	0	0	0	0	3	1	2	318	1	1600	0	200	0	400	186	0	1	1
224	66	1	0	1.53	25.204	0	53	400	7.54717	1	0	0	0	0	0	0	0	0	91	0	1	3	1	14	0	2	0	2	348	1	3100	1	800	1	2300	210	0	3	1
225	56	0	0	1.58	20.83	0	58	300	5.17241	1	0	1	0	0	0	0	0	0	80	0	1	3	1	22	0	2	0	1	480	1	2700	1	500	0	2000	372	1	1	1
226	72	1	0	1.54	26.986	0	54	400	7.40741	2	0	0	1	1	0	0	0	0	76	0	0	0	0	0	0	3	1	2	645	1	3350	1	500	0	1200	492	1	1	1
227	63	0	0	1.62	19.433	0	62	300	4.83871	1	0	0	0	0	0	0	0	0	81	0	0	0	0	0	0	2	0	1	312	1	2100	1	200	0	300	120	0	1	1
228	65	0	0	1.7	24.2215	0	70	550	7.85714	1	0	0	0	0	0	0	0	0	96	0	0	0	1	15	1	2	0	1	438	1	2100	1	500	0	1200	252	1	1	1
229	65	0	0	1.55	26.2227	0	55	400	7.27273	1	0	0	0	0	0	0	0	0	69	0	0	0	0	0	0	2	0	1	648	1	2700	1	500	0	1100	390	1	3	1
230	51	0	0	1.65	18.7328	0	65	300	4.61538	1	0	1	0	0	0	0	0	0	88	1	0	0	1	8	0	3	1	2	546	1	2600	1	600	1	1000	420	1	3	1
231	51	0	0	1.54	21.5045	0	54	300	5.55556	1	0	0	0	1	0	0	0	0	86	0	0	0	1	19	1	3	1	1	330	1	2100	1	300	0	800	126	0	1	2
232	56	0	1	1.68	22.3214	0	68	400	5.88235	3	1	0	0	1	0	0	0	0	74	0	0	0	0	0	1	3	1	1	450	1	2700	1	500	0	1800	342	1	1	2
233	49	0	0	1.56	20.1348	0	56	300	5.35714	3	0	1	0	0	0	0	0	0	84	0	0	0	1	31	0	3	1	2	426	1	3200	1	500	0	1300	318	1	1	2
234	43	0	0	1.56	23.0112	0	56	300	5.35714	3	1	0	0	0	0	0	0	0	76	1	1	35	1	5	0	3	1	2	534	1	2100	1	500	0	1000	444	1	2	1
235	65	0	1	1.59	21.7555	0	59	300	5.08475	3	0	1	0	0	0	0	0	0	77	0	0	0	0	0	0	3	1	1	480	1	2200	1	600	1	1800	372	1	2	1
236	56	0	0	1.6	20.7031	0	60	300	5	3	1	1	0	0	0	0	0	0	75	0	0	0	0	0	0	3	1	2	378	1	1600	0	300	0	1200	270	1	1	1
237	53	0	0	1.58	22.0317	0	58	350	6.03448	2	0	0	0	0	0	0	0	0	73	0	1	5	1	6	1	3	1	1	384	1	1600	0	200	0	1000	246	1	1	1
238	54	0	0	1.62	23.2434	0	62	450	7.25806	1	1	1	0	0	0	0	0	0	81	0	0	0	0	0	0	3	1	1	450	1	2600	1	1000	1	2000	342	1	1	1
239	53	0	0	1.58	22.0317	0	58	400	6.89655	2	0	1	0	0	0	0	0	0	89	0	1	6	1	17	0	3	1	2	300	1	2200	1	400	0	800	198	0	1	2
240	64	0	0	1.6	25	0	60	400	6.66667	2	1	0	0	0	0	0	0	0	64	0	1	26	1	34	0	3	1	2	618	1	2600	1	200	0	800	378	1	1	1
241	67	1	1	1.6	21.4844	0	60	400	6.66667	1	1	0	0	0	0	0	0	1	92	0	0	0	1	15	0	3	1	1	324	1	1600	0	500	0	500	198	0	1	2
242	67	1	0	1.5	23.1111	0	50	400	8	1	0	0	1	1	0	0	0	0	88	0	1	14	1	25	1	3	1	2	450	1	2200	1	300	0	1000	288	1	1	2
243	65	0	0	1.53	16.2331	0	53	300	5.66038	1	1	1	0	0	0	0	0	0	88	0	0	0	0	0	0	3	1	2	258	1	1600	0	200	0	500	156	0	1	2
244	45	0	0	1.58	26.0375	0	58	500	8.62069	3	0	0	0	0	0	0	0	0	74	0	1	8	1	52	0	2	0	1	552	1	3200	1	400	0	2100	432	1	2	1
245	48	0	0	1.65	21.3039	0	65	450	6.92308	1	1	1	0	0	0	1	0	0	65	0	0	0	0	0	0	3	1	1	582	1	2600	1	300	0	1200	384	1	3	2
246	76	1	1	1.68	19.487	0	68	400	5.88235	2	0	1	0	0	0	0	0	1	88	0	0	0	0	0	0	3	1	2	462	1	2600	1	300	0	1100	342	1	1	1
247	57	0	0	1.6	22.2656	0	60	400	6.66667	1	1	0	0	0	0	0	0	0	101	0	1	32	1	11	0	3	1	2	540	1	2100	1	500	0	500	414	1	1	1
248	43	0	0	1.5	22.6667	0	50	300	6	3	0	0	0	0	0	0	0	0	89	1	1	21	1	41	0	3	1	1	528	1	3100	1	1500	1	2300	426	1	2	2
249	47	0	0	1.48	24.1965	0	48	300	6.25	1	0	0	0	0	0	0	0	0	91	1	0	0	1	6	0	2	0	1	492	1	3100	1	1500	1	2000	390	1	1	1
250	30	0	0	1.63	24.4646	0	63	400	6.34921	1	0	0	0	0	0	0	0	0	79	0	0	0	0	0	1	3	1	1	450	1	2700	1	600	1	1400	294	1	1	1
251	44	0	1	1.7	20.7612	0	70	400	5.71429	2	0	1	0	0	0	0	0	0	82	1	1	25	1	18	0	2	0	2	450	1	2100	1	400	0	800	402	1	1	1
252	60	0	0	1.5	24.4444	0	50	300	6	1	0	0	0	1	0	0	0	0	93	0	1	14	1	22	0	3	1	2	318	1	1600	0	200	0	400	186	0	1	1
253	66	1	0	1.53	25.204	0	53	400	7.54717	1	0	0	0	0	0	0	0	0	92	0	0	0	1	19	0	2	0	2	348	1	3100	1	800	1	2300	210	0	3	1
254	56	0	0	1.58	20.83	0	58	300	5.17241	1	0	1	0	0	0	0	0	0	79	0	0	0	0	0	0	2	0	1	480	1	2700	1	500	0	2000	372	1	1	1
255	72	1	0	1.54	26.986	0	54	400	7.40741	2	0	0	1	1	0	0	0	0	103	0	0	0	1	45	0	3	1	2	645	1	3350	1	500	0	1200	492	1	1	1
256	63	0	0	1.62	19.433	0	62	300	4.83871	1	0	0	0	0	0	0	0	0	88	0	0	0	0	0	0	2	0	1	312	1	2100	1	200	0	300	120	0	1	1
